# Supplementary material for: Radiographic assessment of sarcopenia in the trauma setting: a systematic review
Source: PubMed Central journal article supplement — Trauma Surg Acute Care Open. 2020 Mar 15;5(1):e000414. doi: 10.1136/tsaco-2019-000414 (PMC7073778; doi:10.1136/tsaco-2019-000414), 2020-03-15
Supplement: tsaco-2019-000414supp001.pdf [file tsaco-2019-000414supp001.pdf]

## Supplemental Digital Content

### SDC1. Newcastle-Ottawa Scale Ratings for Included Papers

| First Author | Year | Selection | Comparability | Outcome |
|--------------|------|-----------|---------------|---------|
| Akahoshi     | 2016 | ***       | *             | ***     |
| Chang        | 2017 | ***       | *             | ***     |
| Couch        | 2017 | ***       |               | ***     |
| Deandrade    | 2018 | ***       |               | ***     |
| Deren        | 2017 | ***       | *             | ***     |
| Ebbeling     | 2014 | ***       | *             | ***     |
| Fairchild    | 2015 | ***       | *             | ***     |
| Hida         | 2016 | ***       | *             | ***     |
| Hu           | 2018 | ***       | *             | ***     |
| Kaplan       | 2017 | ***       | *             | ***     |
| Leeper       | 2016 | ***       | *             | ***     |
| Lisiecki     | 2013 | ***       |               | ***     |
| Malekpour    | 2017 | ***       | *             | ***     |
| Mccusker     | 2018 | ***       | *             | ***     |
| Mitchell     | 2018 | ***       |               | ***     |
| Oskutis      | 2016 | ***       | *             | ***     |
| Shibahashi   | 2017 | ***       | *             | ***     |
| Touban       | 2019 | ***       | *             | ***     |

## Supplemental Digital Content 2. Sarcopenia Relation to Outcome

| Outcome of Interest              | Paper Name                                                                                                                                            | First Author | Relation to Outcome                                                                                                                                                                | Association with outcome |
|----------------------------------|-------------------------------------------------------------------------------------------------------------------------------------------------------|--------------|------------------------------------------------------------------------------------------------------------------------------------------------------------------------------------|--------------------------|
| <i>In hospital complications</i> | Sarcopenia is predictive of nosocomial infection in care of the elderly                                                                               | Cosquéric    | Sarcopenia is a predictive factor for the occurrence of nosocomial infection (NI) in the next 3 weeks.                                                                             | Yes                      |
|                                  | Sarcopenia is a risk factor for complications and an independent predictor of hospital length of stay in trauma patients                              | De Andrade   | Sarcopenia was associated with overall complications and was an independent risk factor for UTI, wound infection, need for reintubation, and length of hospitalization             | Yes                      |
|                                  | Sarcopenia defined by a computed tomography estimate of the psoas muscle area does not predict frailty in geriatric trauma patients.                  | Mccusker     | Sarcopenia is not predictive of complications, and mortality and adverse disposition in geriatric-trauma patients.                                                                 | No                       |
|                                  | Lean psoas area does not correlate with clinical outcomes in moderately to severely injured older people                                              | Couch        | No association between lean psoas cross-sectional area and in-hospital mortality, inpatient complications or length of hospital stay among older trauma patients                   | No                       |
| Independence post discharge      | Sarcopenia and frailty in elderly trauma patients                                                                                                     | Fairchild    | Lower psoas muscle CSA is related to loss of independence upon discharge in the elderly.                                                                                           | Yes                      |
| Mortality                        | Sarcopenia predicts 90-day mortality in elderly patients undergoing emergency abdominal surgery                                                       | Brandt       | Sarcopenia is predictive of 90-day mortality in elderly patients undergoing emergency abdominal surgery                                                                            | Yes                      |
|                                  | Increased Mortality in Elderly Patients with Sarcopenia and Acetabular Fractures                                                                      | Deren        | Sarcopenia is common in elderly patients with acetabular fractures and is associated with lower-energy mechanisms, anterior column fractures, and higher risk of 1-year mortality. | Yes                      |
|                                  | Sarcopenia Measured Using Masseter Area Predicts Early Mortality following Severe Traumatic Brain Injury                                              | Hu           | Patients with sarcopenia had significantly increased rates of 30-day mortality                                                                                                     | Yes                      |
|                                  | Association of Radiologic Indicators of Frailty With 1-Year Mortality in Older Trauma Patients: Opportunistic Screening for Sarcopenia and Osteopenia | Kaplan       | Sarcopenia and osteopenia were associated with higher risks of 1-year mortality alone and in combination                                                                           | Yes                      |

|           |                                                                                                                                                             |            |                                                                                                                                                                                                                 |     |
|-----------|-------------------------------------------------------------------------------------------------------------------------------------------------------------|------------|-----------------------------------------------------------------------------------------------------------------------------------------------------------------------------------------------------------------|-----|
|           | Computed tomography abbreviated assessment of sarcopenia following trauma: The CAAST measurement predicts 6-month mortality in older adult trauma patients. | Leeper     | Sarcopenia is a strong predictor of 6-month postdischarge mortality for older trauma patients.                                                                                                                  | Yes |
|           | The Effect of Sarcopenia on Outcomes in Geriatric Blunt Trauma.                                                                                             | Malekpour  | Sarcopenia is predictive of in-hospital mortality and length of stay                                                                                                                                            | Yes |
|           | Sarcopenia Is Predictive of 1-Year Mortality After Acetabular Fractures in Elderly Patients.                                                                | Mitchell   | Sarcopenia is an independent risk factor for 1-year mortality in elderly patients with acetabular fractures.                                                                                                    | Yes |
|           | Skeletal Muscle as a Factor Contributing to Better Stratification of Older Patients with Traumatic Brain Injury: A Retrospective Cohort Study               | Shibahashi | Decreased skeletal muscle mass is associated with poor outcomes 6 months following TBI in older patients.                                                                                                       | Yes |
|           | Decreased Lean Psoas Cross-Sectional Area Is Associated With Increased 1-Year All-Cause Mortality in Male Elderly Orthopaedic Trauma Patients.              | Touban     | Sarcopenia was associated with increased 1-year mortality in males                                                                                                                                              | Yes |
|           | Lean psoas area does not correlate with clinical outcomes in moderately to severely injured older people                                                    | Couch      | No association between lean psoas cross-sectional area and in-hospital mortality, inpatient complications or length of hospital stay among older trauma patients                                                | No  |
|           | Psoas:lumbar vertebra index: central sarcopenia independently predicts morbidity in elderly trauma patients                                                 | Ebbeling   | PLVI was not associated with mortality in univariate or multivariable modeling. After controlling for comorbidities, low PLVI was found to be strongly associated with morbidity (OR 4.91, 95 % CI 2.28–10.60). | No  |
| Morbidity | Psoas:lumbar vertebra index: central sarcopenia independently predicts morbidity in elderly trauma patients                                                 | Ebbeling   | PLVI was not associated with mortality in univariate or multivariable modeling. After controlling for comorbidities, low PLVI was found to be strongly associated with morbidity (OR 4.91, 95 % CI 2.28–10.60). | Yes |
|           | Sarcopenia and sarcopenic leg as potential risk factors for acute osteoporotic vertebral fracture among older women                                         | Hida       | Higher prevalence of sarcopenia and lower leg muscle mass among patients with acute OVF compared with patients who did not have an OVF.                                                                         | Yes |

|                |                                                                                                                                                               |           |                                                                                                                                                                                                                                         |     |
|----------------|---------------------------------------------------------------------------------------------------------------------------------------------------------------|-----------|-----------------------------------------------------------------------------------------------------------------------------------------------------------------------------------------------------------------------------------------|-----|
|                | Increased Mortality in Elderly Patients with Sarcopenia and Acetabular Fractures                                                                              | Deren     | Sarcopenia is common in elderly patients with acetabular fractures and is associated with lower-energy mechanisms, anterior column fractures, and higher risk of 1-year mortality.                                                      | Yes |
|                | Are frailty markers associated with serious thoracic and spinal injuries among motor vehicle crash occupants?                                                 | Oskutis   | Sarcopenia is associated with severe thoracic injury                                                                                                                                                                                    | Yes |
| Length of stay | Sarcopenia is a predictive factor for prolonged intensive care unit stays in high-energy blunt trauma patients                                                | Akahoshi  | Sarcopenia is predictive of length of stay in ICU                                                                                                                                                                                       | Yes |
|                | Effect of sarcopenia on clinical and surgical outcome in elderly patients with proximal femur fractures                                                       | Chang     | Lower PSD was associated with longer hospitalization and higher volume of blood transfusion, while lower SMI was only associated with longer hospitalization                                                                            | Yes |
|                | Sarcopenia is a risk factor for complications and an independent predictor of hospital length of stay in trauma patients                                      | Deandrade | Sarcopenia was associated with overall complications and was an independent risk factor for UTI, wound infection, need for reintubation, and length of hospitalization                                                                  | Yes |
|                | Morphomic measurement of the temporalis muscle and zygomatic bone as novel predictors of hospital-based clinical outcomes in patients with mandible fracture. | Lisiecki  | Decreased thicknesses of the zygomatic bone and temporalis muscle are significantly correlated with higher hospital, ventilator, and intensive care unit days in patients with mandibular fracture receiving reconstructive operations. | Yes |
|                | The Effect of Sarcopenia on Outcomes in Geriatric Blunt Trauma.                                                                                               | Malekpour | Sarcopenia is predictive of in-hospital mortality and length of stay                                                                                                                                                                    | Yes |
|                | Lean psoas area does not correlate with clinical outcomes in moderately to severely injured older people                                                      | Couch     | No association between lean psoas cross-sectional area and in-hospital mortality, inpatient complications or length of hospital stay among older trauma patients                                                                        | No  |
